# Supplementary material
Source: Springer Nature journal article supplement (https://www.springermedizin.de/resource/supplementary/13014_2012_803_MOESM8_ESM.pdf/9634764)

Surviving fraction

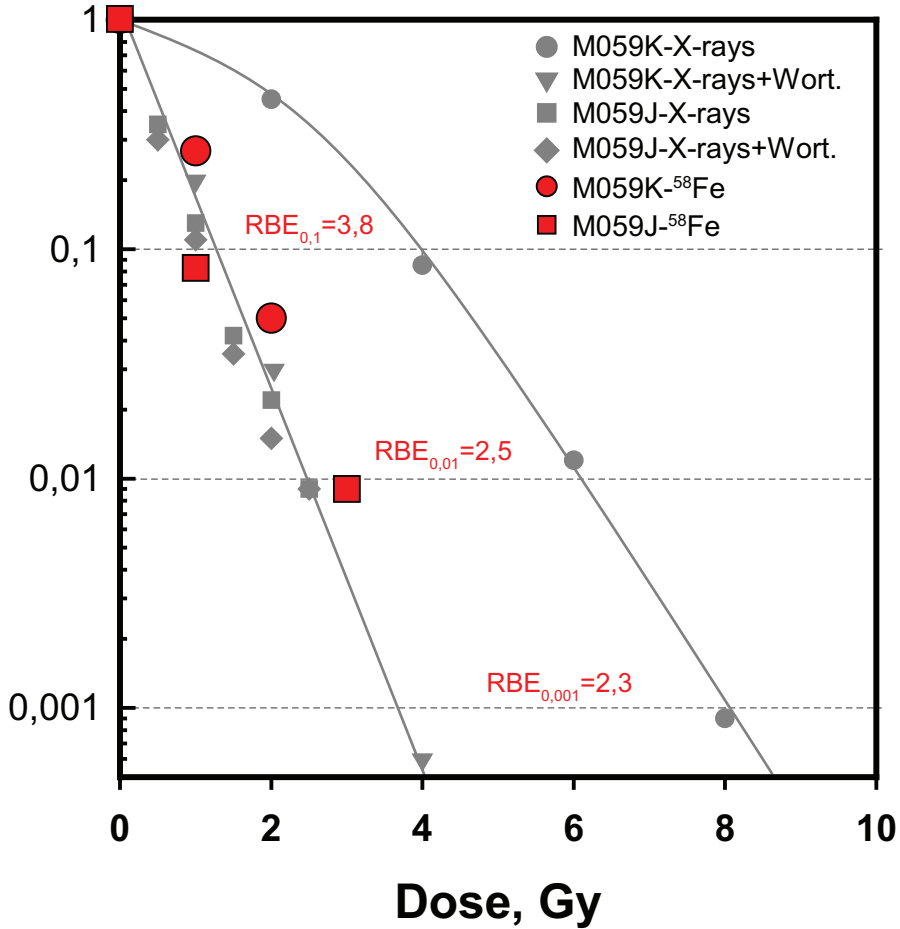

Supplement: MOESM8 [file 9634764]
